# Supplementary material for: Borrelia Infections in Ageing Ticks: Relationship with Morphometric Age Ratio in Field-Collected Ixodes ricinus Nymphs
Source: MDPI journal article supplement (doi:10.3390/microorganisms10010166), 2022-01-13
Supplement: s1 [file s1]

**Table S1.** Results of the LM investigating the effect of different variables on log-transformed *Borrelia* 5S-23S IGS copy numbers among 92 *B. afzelii*-positive ticks. The full model was significantly different from a null model containing only the random factor (Df = 13, F = 3.72,  $p < 0.001$ ).

| Variable                               | Estimate  | Std. Error | t-value | p-value      |
|----------------------------------------|-----------|------------|---------|--------------|
| Intercept                              | 4.9       | 2.92       | 1.67    | 0.099        |
| Month                                  |           |            |         |              |
| March                                  | Reference | -          | -       | -            |
| April                                  | -1.0      | 0.95       | -1.09   | 0.281        |
| May                                    | 0.99      | 0.74       | 1.33    | 0.187        |
| June                                   | 1.08      | 0.65       | 1.67    | 0.100        |
| July                                   | 1.65      | 0.71       | 2.32    | <b>0.023</b> |
| August                                 | -0.45     | 1.27       | -0.36   | 0.723        |
| September                              | -0.21     | 1.19       | -0.18   | 0.858        |
| October                                | -0.99     | 1.20       | -0.83   | 0.412        |
| Morphometric age ratio                 |           |            |         |              |
| 1.51-1.60                              | Reference | -          | -       | -            |
| 1.41-1.50                              | -2.57     | 1.98       | -1.30   | 0.200        |
| 1.31-1.40                              | -2.48     | 1.78       | -1.39   | 0.169        |
| 1.21-1.30                              | -1.20     | 1.73       | -0.69   | 0.495        |
| 1.11-1.20                              | -1.81     | 1.73       | -1.04   | 0.300        |
| 0.80-1.00                              | -6.28     | 2.40       | -2.61   | <b>0.011</b> |
| <i>Ixodes</i> ITS2 copies <sup>1</sup> | 0.10      | 0.17       | 0.59    | 0.558        |

<sup>1</sup> log transformed
